# Supplementary material for: Epigenetic silencing of CD4 expression in nonpathogenic SIV infection in African green monkeys
Source: PubMed Central journal article supplement (PMC7526541; doi:10.1172/jci.insight.139043), 2020-09-17
Supplement: jciinsight-5-139043-s176.pdf [file jciinsight-5-139043-s176.pdf]

CLUSTAL O(1.2.4) multiple sequence alignment: E4P

|        |                                                                                         |     |
|--------|-----------------------------------------------------------------------------------------|-----|
| Human  | CACCTGTGGTCTAGTATTATTAGGAGGCTGAGGGAGAAGAATCACTGGAGGCTAGGATTT                            | 60  |
| Rhesus | CACCTGTGGTCTAGTATTATTAGGAGGCTGAGGGAGAGGAATCACTG----GAAGGATTT                            | 56  |
| Patas  | CACCTGTGGTCTAGTATTATTAGGAGGCTGAGGGAGAGGAATCACTGGAGCCCAGGATTT                            | 60  |
| AGM    | CACCTGTGGTCTAGTATTATTAGGAGGCTGAGGGAGAGGAATCACTGGAGCCCAGGATTT                            | 60  |
|        | *****                                                                                   |     |
| Human  | CCAGGCTGTAGTGAGCCATGATTGTGCTATTCTCACTCCAGCTTGGGTGACAGGGTGAGAT                           | 120 |
| Rhesus | CCAGGCTGTAGTGAGCCATGATTGTGCTATTCTCACTCCAGAGTGGGTGACAGGGTGAGAT                           | 116 |
| Patas  | CCAGGCTGTAGTGAGCCATGATTGTGCTATTCTCACTCCAGAGTGGGTGACAGGGTGAGAT                           | 120 |
| AGM    | CCAGGCTGTAGTGAGCCATGATTGTGCTATTCTCACTCCAGAGTGGGTGACAGGGTGAGAT                           | 120 |
|        | *****                                                                                   |     |
| Human  | CCTGTCTCTAAAAAGAATAATAACAATAATAATAACATTATCTCACACAACGAGGAATC                             | 180 |
| Rhesus | CCTGTCTCTAAAAATAATAATAACGATCACAATACACACTATCTCACACAATGAGGAACT                            | 176 |
| Patas  | CCTGTCTCTAAAAATAATAATAACGATCACAATACACACTATCTCACACAATGAGGAACT                            | 180 |
| AGM    | CCTGTCTCTAAAAATAATAATAACGATCACAATACACACTATCTCACACAATGAGGAACT                            | 180 |
|        | *****                                                                                   |     |
|        | <b>RUNX3</b>                                                                            |     |
| Human  | CAGGAGCAGTCTTGCTGAGTAGTTCTGGCACAGGGTGC <b>TCATGAGGTGCT</b> GCAGGT                       | 240 |
| Rhesus | CAGGAGCAGTCTTGCTGAGTAGTTCTGGCACAGGGTGC <b>TCATGAGGTGCT</b> GCAGGT                       | 236 |
| Patas  | CAGGAGCAGTCTTGCTGAGTAGTTCTGGCACAGGGTGC <b>TCATGAGGTGCT</b> GCAGGT                       | 240 |
| AGM    | CAGGAGCAGTCTTGCTGAGTAGTTCTGGCACAGGGTGC <b>TCATGAGGTGCT</b> GCAGGT                       | 240 |
|        | *****                                                                                   |     |
| Human  | GAGGGTCAGGCTGGAGCCATCTGAAGGCTGGGATGGGGCTGGAGATTCTGCCTCCAAGA                             | 300 |
| Rhesus | GTGGGCCAGGCCAGGAGCCATCTGAAGGCTGGGATGGGGCTGGAGATTCTGCCTCCAAGA                            | 296 |
| Patas  | GTGGGCCAGGCCAGGAGCCATCTGAAGGCTGGGATGGGGCTGGAGATTCTGCCTCCAAGA                            | 300 |
| AGM    | GTGGGCCAGGCCAGGAGCCATCTGAAGGCTGGGATGGGGCTGGAGATTCTGCCTCCAAGA                            | 300 |
|        | *****                                                                                   |     |
| Human  | CAGCT <b>CCCT</b> TGGGAGGCTGTGGCCAGAGGCCCTTA <b>ACTCC</b> CCTGT-GTGGGTGCTCTTT           | 359 |
| Rhesus | CAGCT <b>CCCT</b> TGGGAGGCTGTGGCCAGAGGCCCTTAGCGCC <b>TCC</b> CTGCGTTGGGCGTCTTT          | 356 |
| Patas  | CAGCT <b>CCCT</b> TGGGAGGCTGTGGCCAGAGGCCCTTAGCAC <b>CTCC</b> CTGC-TTGGGCGTCTTT          | 359 |
| AGM    | CAGCT <b>CCCT</b> TGGGAGGCTGTGGCCAGAGGCCCTTAGCAC <b>CTCC</b> CTGC-TTGGGCGTCTTT          | 359 |
|        | *****                                                                                   |     |
| Human  | ATGGGGCCCTCTCACAAACAC <b>G</b> ACACAGCAACTGGCT <b>TCCC</b> CAGAGGGACAGCGTGGAAAA         | 419 |
| Rhesus | ATGGGGCCCTCTCACAAACAT <b>G</b> ACACAGCAACTGGCT <b>TCCC</b> CAGAGGGACAGCGTGGACAA         | 416 |
| Patas  | ATGGGGCCCTCTCACAAACAC <b>G</b> ACACAGCAACTGGCT <b>TCCC</b> CAGAGGGACAGCGTGGACAA         | 419 |
| AGM    | ATGGGGCCCTCTCACAAACAC <b>G</b> ACACAGCAACTGGCT <b>TCCC</b> CAGAGGGACAGCGTGGACAA         | 419 |
|        | *****                                                                                   |     |
|        | <b>LEF1/TCF</b>                                                                         |     |
| Human  | GACAAAAGCTACCACATCTTTATTTCAAGA <b>TG</b> AGATT <b>GA</b> TCTTGAAAACACGTGCCAT            | 479 |
| Rhesus | GACAAAAGCTACCATGTCTT----- <b>TTG</b> ATCTGGAAAACAACATACCAT                              | 460 |
| Patas  | GACAAAAGCTACCATGTCTTTATTTCAAGA <b>TG</b> AATT <b>GA</b> TCTGAAAACAACATACCAT             | 479 |
| AGM    | GACAAAAGCTACCATGTCTTTATTTCAAGA <b>TG</b> AATT <b>GA</b> TCTTGAAAACAACATACCAT            | 479 |
|        | *****                                                                                   |     |
| Human  | AATTTCTGCCCTATTCTATTGATCAGAGACCA <b>ACTGG</b> TGCAAGCAGGAGGGGGCAAT                      | 539 |
| Rhesus | GATTTCTGCCCTATTCTATTGGTCAAGAGACCA <b>ACTGG</b> TGCAAGCAGGAGGGGGCAAT                     | 520 |
| Patas  | GATTTCTGCCCTATTCTATTGGTCAAGAGACCA <b>ACTGG</b> TGCAAGCAGGAGGGGGCAAT                     | 539 |
| AGM    | GATTTCTGCCCTATTCTATTGGTCAAGAGACCA <b>ACTGG</b> TGCAAGCAGGAGGGGGCAAT                     | 539 |
|        | *****                                                                                   |     |
| Human  | GCAAGGGTGTGA <b>ACTG</b> AGGGAGACAGGAGTCACTGGGGCCATCTTG <b>CAG</b> CCTGGCTGTC           | 599 |
| Rhesus | GCAAGGGTGTGA <b>ACG</b> GAGGGAGACAGGAGTCACTGGGGCCATCTTG <b>CAG</b> CCTGGCTGTC           | 580 |
| Patas  | GCAAGGGTGTGA <b>ACG</b> GAGGGAGACAGGAGTCACTGGGGCCATCTTG <b>CAG</b> CCTGGCTGTC           | 599 |
| AGM    | GCAAGGGTGTGA <b>ACG</b> GAGGGAGACAGGAGTCACTGGGGCCATCTTG <b>CAG</b> CCTGGCTGTC           | 599 |
|        | *****                                                                                   |     |
| Human  | AGAGTGG <b>G</b> GAGCAGTCCCTGA <b>AA</b> CAGAGATAGGCCAAGAGACGGGAAGGGACGCTCT <b>G</b> A  | 659 |
| Rhesus | AGAGTGG <b>G</b> GAGCAGTCCCTGA <b>AA</b> CAGGGATAGGCCAAGAGAGGAGAGGGACCCCT <b>G</b> A    | 640 |
| Patas  | AGAGTGG <b>G</b> GAGCAGTCCCTGA <b>AA</b> CAGGGATAGGCCAAGAGAGGAGAGGGACCCCT <b>G</b> A    | 659 |
| AGM    | AGAGTGG <b>G</b> GAGCAGTCCCTGA <b>AA</b> CAGGGATAGGCCAAGAGAGGAGAGGGACCCCT <b>G</b> A    | 659 |
|        | *****                                                                                   |     |
| Human  | GCATCTCCATCCCCAGCCCTCTCTCTTGTCCACTCTC <b>G</b> AGAAGTCTGGAAAGCCAAAGTG                   | 719 |
| Rhesus | GCATCTCCATCCCCAGCTGTCTCTCTTGTCCACTCTC <b>G</b> AGAAGTCTGGAAAGCCAAAGTG                   | 700 |
| Patas  | GCATCTCCATCCCCAGCCATCTCTCTTGTCCACTCTC <b>G</b> AGAAGTCTGGAAAGCCAAAGTG                   | 719 |
| AGM    | GCATCTCCATCCCCAGCCATCTCTCTTGTCCACTCTC <b>G</b> AGAAGTCTGGAAAGCCAAAGTG                   | 719 |
|        | *****                                                                                   |     |
| Human  | AGGTCCAGGGCCTTG <b>G</b> CAAGTCGAGTGTGTGAGGTAGGAGGCCATACTGTGCACATT <b>C</b> AG          | 779 |
| Rhesus | AGGTCTAGGGCCCTTG <b>G</b> CAAGTCGAGTGTGTGAGGTAGAAGGCC <b>T</b> ACTGTGCACACT <b>C</b> AG | 760 |
| Patas  | AGGTCTAGGGCCCTTG <b>G</b> CAAGTCGAGTGTGTGAGGTAGGAGGCC <b>T</b> ACTGTGCACACT <b>C</b> AG | 779 |
| AGM    | AGGTCTAGGGCCCTTG <b>G</b> CAAGTCGAGTGTGTGAGGTAGGAGGCC <b>T</b> ACTGTGCACACT <b>C</b> AG | 779 |

\*\*\*\*\*

Human CCTTGGAGTCGGGTTTGCCAGCGGTTCGCCCTACCCCTGACGTGGTCTTCTCAGCTCCATA 839  
Rhesus CCCTGGAGTCGGGTTTGCCAGCTGTTCGCCCTACCCGTGACCTGGTCTTCTCAGCTCCATA 820  
Patas CCTTGGAGTCGGGTTTGCCAGCCGTTCGCCCTACCCGTGACCTGGTCTTCTCAGCTCCATA 839  
AGM CCCTGGAGTCGGGTTTGCCAGCCGTTCGCCCTACCCGTGACCTGGTCTTCTCAGCTCCATA 839  
\* \* \* \* \*

Human GTGCAGAGGAGGACCTCTGCAGGCCAGAAATTTCCCTGCCACCTCCCTACCAGGTA 899  
Rhesus GCGCAGAGGAGGACCTCTGCAGGCCAGAAATGTCTTGCCACCTCCCTACCTGGTA 880  
Patas GCGCAGAGGAGGACCTCTGCAGGCCAGAAATGTCTTGCCACCTCCCTGCCTGGTA 899  
AGM GCGCAGAGGAGGACCTCTGCAGGCCAGAAATGTCTTGCCACCTCCCTGCCTGGTA 899  
\* \* \* \* \*

**LEF1/TCF**

Human GAGATGTTAGGTTTACAGCCCTGAGCCCTGCTGCTATCCCTCCTTCAAAGGAGGATCA 959  
Rhesus GAGATGTTAGGTTTACAGCCCTGAGCCCTGCTGCTATCCCTCCTTCAAAGGAGGATCA 940  
Patas GAGATGTTAGGTTTACAGCCCTGAGCCCTGCTGCTATCCCTCCTTCAAAGGAGGATCA 959  
AGM GAGATGTTAGGTTTACAGCCCTGAGCCCTGCTGCTATCCCTCCTTCAAAGGAGGATCA 959  
\* \* \* \* \*

**LEF1/TCF**

Human AGGAGCTTAGGATCCCTGCACAGGCCACCCAGGGTGGGGTTCTTCCTTTGAAGGGAA 1019  
Rhesus AGGAGCTTAGGATCCCTGCACAGGCCACCCAGGGTGGGGTTCTTCCTTTGAAGGGAG 1000  
Patas AGGAGCTTAGGATCCCTGCACAGGCCACCCAGGGTGGGGTTCTTCCTTTGAAGGGAA 1019  
AGM AGGAGCTTAGGATCCCTGCACAGGCCACCCAGGGTGGGGTTCTTCCTTTGAAGGGAA 1019  
\* \* \* \* \*

**RUNX1**

Human TTGCTTTGGGGTGGGGTTCGGTTCTATCTGCTCCACTCTGTGGCTGACAGTTTCTCCAAGG 1079  
Rhesus TGGGTTTGGGGTAGGGTTCGGTTCTATCTGTTCTACTCTGTGGCTGACAGTTTCTCCAAGG 1060  
Patas TGGGTTTGGGGTAGGGTTCGGTTCTATCTGTTCTACTCTGTGGCTGACAGTTTCTCCAAGG 1079  
AGM TGGGTTTGGGGTAGGGTTCGGTTCTATCTGTTCTACTCTGTGGCTGACAGTTTCTCCAAGG 1079  
\* \* \* \* \*

**ZEB**

Human GGCTGCAGGTGTACAGTGTCTGAGCCGGGCTGAGCTCTGAAACGTGCCTACTCAAACCT 1139  
Rhesus GGCTGCAGGTGTACAGTGTCTGAGGCCAGCCTGAGCTCTGAAATGTGCCTACTCAAACCT 1120  
Patas GGCTGCAGGTGTACAGTGTCTGAGCCAGCCGAGCTCTGAAATGTGCCTACTCAAACCT 1139  
AGM GGCTGCAGGTGTACAGTGTCTGAGCCAGCCTGAGCTCTGAAATGTGCCTACTCAAACCT 1139  
\* \* \* \* \*

Human CCCGTGGGGTAGGGGAGGCCAGAACCCCTCTGAGAGTGGCAAAAAGTGGTCCCTGGAG 1199  
Rhesus CCA-TGGGGTAGGGGAGGCCAGAACCCCTCTGAGAGTGGCAACAAGTGGTCCCTGCAG 1179  
Patas CCCGTGGGGTAGGGGAGGCCAGAACCCCTCTGAGAGTGGCAACAAGTGGTCCCTGCAG 1199  
AGM CCCGTGGGGTAGGGGAGGCCAGAACCCCTCTGAGAGTGGCAACAAGTGGTCCCTGCAG 1199  
\* \* \* \* \*

Human CCAGGGGAAATGTGGATGGGGTAGA-1224  
Rhesus CCAGGGGAAATGTGGATGGGGTAGAC1205  
Patas CCAGGGGAAATGTGGATGGGGTAGAC1225  
AGM CCAGGGGAAATGTGGATGGGGTAGAC1225  
\* \* \* \* \*

CLUSTAL O(1.2.4) multiple sequence alignment: TSS

```

                                     ELF/ETS
Patas      ---GGGGCCGGCCAGGCCTAGGGTGTGGAGGAACCTCGCCATCGGGCTTCCTGTCTCT 56
AGM        ---GGGGCCGGCCAGGCCTAGGGTATGGAGGAGCCTCGCCATCGGGCTTCCTGTCTCT 56
Rhesus     ---GGGGCCGGCCAGGCCTAGGGTGTGGAGGAGCCTCGCCATCGGGCTTCCTGTCTCT 56
Human      GTTTGGGGCCGGCCAGGCCTAGGGTGTGGAGGAGCCTTGCCATCGGGCTTCCTGTCTCT 60
          *****
                                     TCF-1
Patas      CTTCAATTAAGCACGACTCTGCAGAAGGAACAAAGCACCCCTCCCCACTGGGCTCCTGGTT 116
AGM        CTTCAATTAAGCACGACTCTGCAGAAGGAACAAAGCACCCCTCCCCACTGGGCTCCTGGTT 116
Rhesus     CTTCAATTAAGCACGACTCTGCAGAAGGAACAAAGCACCCCTCCCCACTGGGCTCCTGGTT 116
Human      CTTCAATTAAGCACGACTCTGCAGAAGGAACAAAGCACCCCTCCCCACTGGGCTCCTGGTT 120
          *****

Patas      GCAAAGCTCCAAGTCCTCACACAGATACACTTGT 150
AGM        GCAAAGCTCCAAGTCCTCACACAGATACACTTGT 150
Rhesus     GCAAAGCTCCAAGTCCTCATAACAGATACACTTGT 150
Human      GCAGAGCTCCAAGTCCTCACACAGATACGC---- 150
          *** ***** *
```

CLUSTAL O(1.2.4) multiple sequence alignment: S4

|        |                                                                               |     |
|--------|-------------------------------------------------------------------------------|-----|
| Human  | CGGTTCCCCCGATGTGGGTGTCTGAGGCGAAGAAGAGGATGGCGGAGGTTGCAGCC <b>CCA</b>           | 60  |
| Rhesus | CGGTTCCCCCGATGTGGGTGTCTGAGGCGAAGAAGAGGATGGCGGAGGTTGCAGCC <b>CCA</b>           | 60  |
| Patas  | CGGTTCCCCCGATGTGGGTGTCTGAGGCGAAGAAGAGGATGGCGGAGGTTGCAGCC <b>CCA</b>           | 60  |
| AGM    | CGGTTCCCCCGATGTGGGTGTCTGAGGCGAAGAAGAGGATGGCGGAGGTTGCAGCC <b>CCA</b>           | 60  |
|        | *****                                                                         |     |
|        | <b>RUNX3</b>                                                                  |     |
| Human  | <b>ACCACAAGAG</b> TTCCTTAGAGGGGTCACAGTCTCTAGGAAGTTT <b>A</b> TAGGAAGCTAGTCAGC | 120 |
| Rhesus | <b>ACCACAAGAG</b> TTCCTTAGAGGGGTCACAGTCTCTAGGAAGTTT <b>A</b> TAGGAAGCCAGTCAGC | 120 |
| Patas  | <b>ACCACAAGAG</b> TTCCTTAGAGGGGTCACAGTCTCTAGGAAGTTT <b>C</b> TAGGAAGCCAGTCAGC | 120 |
| AGM    | <b>ACCACAAGAG</b> TTCCTTAGAGGGGTCACAGTCTCTAGGAAGTTT <b>C</b> TAGGAAGCCAGTCAGC | 120 |
|        | *****                                                                         |     |
|        |                                                                               |     |
| Human  | AGTAGAGAGGGTGAACGCGGTGGGGCACATCCCGCGGCTGGGCT <b>T</b> GAGTGGGCTGCTTGG         | 180 |
| Rhesus | AGTAGAGAGGGTGAACGCGGTGGGGCACATCCCGCGGCTGGGCT <b>T</b> GAGTGGGCTGCTTGG         | 180 |
| Patas  | AGTAGAGAGGGTGAACGCGGTGGGGCACATCCCGCGGCTGGGCT <b>C</b> GAGTGGGCTGCTTGG         | 180 |
| AGM    | AGTAGAGAGTGTGAACGCGGTGGGGCACATCCCGCGGCTGGGCT <b>C</b> GAGTGGGCTGCTTGG         | 180 |
|        | *****                                                                         |     |
|        |                                                                               |     |
|        | <b>LEF1</b>                                                                   |     |
| Human  | GGGTTATGGGG <b>GAAGATAAAAGTGCC</b> TGTGGGACCACAGACTCTCGCTGTGGTGGAGCT          | 240 |
| Rhesus | GGGTTATGGGAG <b>GAAGATAAAAGTGCC</b> TGTGGGACCACAGACTCTTGCTGTGGTGGAGCT         | 240 |
| Patas  | GGGTTATGGGAG <b>GAAGATAAAAGTGCC</b> TGTGGGACCACAGACTCTCGCTGTGGTGGAGCT         | 240 |
| AGM    | GGGTTATGGGAG <b>GAAGATAAAAGTGCC</b> TGTGGGACCACAGACTCTCGCTGTGGTGGAGCT         | 240 |
|        | *****                                                                         |     |
|        |                                                                               |     |
| Human  | GGGCCCTCTTACCCTCCCAAGCCTCGCCCTC <b>A</b> TCCCATCCCTGGGGGCCAGGGGTGAGG          | 300 |
| Rhesus | GGGCCCTCTTACCCTCCCAAGCCTCGCTCCTC <b>A</b> TCCCATCCCTGGGGGCCAGGGGTGAGG         | 300 |
| Patas  | GGGCCCTCTTACCCTCCCAAGCCTCGCTCCTC <b>G</b> TCCCATCCCTGGGGGCCAGAGGTGAGG         | 300 |
| AGM    | GGGCCCTCTTACCCTCCCAAGCCTCACTCCTC <b>G</b> TCCCATCCCTGGGGGCCAGGGGTGAGG         | 300 |
|        | *****                                                                         |     |
|        |                                                                               |     |
|        | <b>RUNX3</b>                                                                  |     |
| Human  | GCGGCAG <b>GGAACCTCAAGG</b> CTCTGAGAAAGTGCGTGGTGTGTGTTGCCATTTTGGTCTCTT        | 360 |
| Rhesus | GCGGCAG <b>GGAACCTCAAGG</b> CTCTGAGAGAGTGCGTGGTGTGTGTTGCCATTTTGGTCTCAT        | 360 |
| Patas  | GCGGCAG <b>GGAACCTCAAGG</b> CTCTGAGAGAGTGCGTGGTGTGTGTTGCCATTTTGGTCTCAT        | 360 |
| AGM    | GCGGCAG <b>GGAACCTCAAGG</b> CTCTGAGAGAGTGCGTGGTGTGTGTTGCCATTTTGGTCTCAT        | 360 |
|        | *****                                                                         |     |
|        |                                                                               |     |
| Human  | CTCTTTCTCAGTCTCTCTTTGCCTCACTTTGGATCT <b>A</b> TGCTCTGTGCATCTGTCTT-            | 416 |
| Rhesus | CTCTTTCTCAGTCTCTCTTTGCCTCACTTTGGATCT <b>A</b> TGCTCTGTGCATCTGTCTTG            | 417 |
| Patas  | CTCTTTCTCAGTCTCTCTTTGCCTCACTTTGGATCT <b>G</b> TGCTCTGTGCATCTGTCTTG            | 417 |
| AGM    | CTCTTTCTCAGTCTCTCTTTGCCTCACTTTGGATCT <b>G</b> TGCTCTGTGCATCTGTCTTG            | 417 |
|        | *****                                                                         |     |
